# Supplementary material for: Expression Analysis of ZPB2a and Its Regulatory Role in Sperm-Binding in Viviparous Teleost Black Rockfish
Source: MDPI journal article supplement (doi:10.3390/ijms23169498), 2022-08-22
Supplement: s1 [file s1]

Table S1 Results of the four human ZP proteins matching to the genome of *S. schlegelii* by local Blast.

| Query              | Subjct       | Accession number | Identity | E value |
|--------------------|--------------|------------------|----------|---------|
| Human_ZPB1(ZP1)    | Ssc_10013305 | ON685210         | 37%      | 2e-056  |
|                    | Ssc_10016187 | ON685211         | 37%      | 3e-050  |
|                    | Ssc_10000158 | NA               | 34%      | 6e-046  |
| Human_ZPB2(ZP4)    | Ssc_10013305 | ON685210         | 38%      | 8e-072  |
|                    | Ssc_10016187 | ON685211         | 38%      | 2e-069  |
|                    | Ssc_10000158 | NA               | 36%      | 9e-060  |
| Human_ZPA(ZP2)     | Ssc_10013305 | ON685210         | 33%      | 3e-036  |
|                    | Ssc_10016187 | ON685211         | 32%      | 1e-035  |
|                    | Ssc_10008129 | NA               | 30%      | 6e-034  |
| Human_ZPC(ZP3)     | Ssc_10014949 | ON685212         | 41%      | 4e-056  |
|                    | Ssc_10003055 | ON685213         | 39%      | 5e-048  |
|                    | Ssc_10016186 | NA               | 38%      | 9e-048  |
| Human_ZPB1-26-551* | Ssc_10013305 | ON685210         | 38%      | 9e-069  |
|                    | Ssc_10016187 | ON685211         | 36%      | 6e-061  |
|                    | Ssc_10000158 | NA               | 35%      | 9e-059  |
| Human_ZPB2-22-463* | Ssc_10013305 | ON685210         | 39%      | 5e-072  |
|                    | Ssc_10016187 | ON685211         | 39%      | 2e-068  |
|                    | Ssc_10000158 | NA               | 36%      | 2e-059  |

\* *E. coli* expressed human zona pellucida protein fragments has been proved to bind sperm *in vitro* [11, 38]
