# Supplementary material for: Expression Analysis of ZPB2a and Its Regulatory Role in Sperm-Binding in Viviparous Teleost Black Rockfish
Source: MDPI journal article supplement (doi:10.3390/ijms23169498), 2022-08-22
Supplement: s1 [file s1]

Table S2. The primers used in this study.

| Gene Symbol   | Primer sequence (5'-3')                                            | usage                  |
|---------------|--------------------------------------------------------------------|------------------------|
| <b>ZPB2a</b>  | F: CGCGGATCCGTTACTGCCCAGCATCACTG<br>R: GCAAGCTTTCATCTCTGCAATTTGCCG | prokaryotic expression |
| <b>ZPB2c</b>  | F: CTCGAGGACACTCAATATGGCCAGATT<br>R: AAGCTTTTATTGAATTCGGCTTGGGTC   | prokaryotic expression |
| <b>ZPB2a</b>  | F: GTCAGTCTGCTGGAAACAA<br>R: GTTCTCGTACACCACGTAAC                  | qPCR                   |
| <b>CRHBP</b>  | F: TGTTTGGTGGAAGTCTATT<br>R: GTGACTCAGCACATCGTTTA                  | qPCR                   |
| <b>SPAM1</b>  | F: CCTGCTGATCCACAGATTTC<br>R: CGTGAGAAAGACTGACACATT                | qPCR                   |
| <b>PRM</b>    | F: GGCAAAGAGTCCGAAGAAA<br>R: GTCGCATTCAAGTGTTCATTAG                | qPCR                   |
| <b>IZUMO1</b> | F: CGTCCCGAAGCCTCAAC<br>R: CAGAGCTGTAACCGTGAGGAT                   | qPCR                   |
| <b>RPL17</b>  | F: AGGCGACGCACCTACCG<br>R: CCTCTGGTTTGGGGACGA                      | qPCR                   |
